# Supplementary material for: Transport and Utilization of Glycogen Breakdown Products by Gardnerella spp. from the Human Vaginal Microbiome
Source: PubMed Central journal article supplement (PMC10101108; doi:10.1128/spectrum.04435-22), 2023-03-15
Supplement: spectrum.04435-22-s0001.pdf [file spectrum.04435-22-s0001.pdf]

**Supplemental Table 1:** Summary of the total number of bases, read lengths and coverage produced by Nanopore whole genome sequencing

| Species               | Isolate | Total number of contigs | Total length of assembly (bp) | Min. read length (bp) | Max read length (bp) | Average read length (bp) | Coverage (x) | Busco score | Circular contig (Y/N*) |
|-----------------------|---------|-------------------------|-------------------------------|-----------------------|----------------------|--------------------------|--------------|-------------|------------------------|
| <i>G. leopoldii</i>   | GH005   | 1                       | 708,331,962                   | 1,000                 | 70,429               | 3,749                    | 482          | 87.3        | Y                      |
|                       | NR017   | 1                       | 625,880,717                   | 1,000                 | 89,494               | 6,144                    | 412          | 84.5        | Y                      |
|                       | VN003   | 1                       | 50,269,029                    | 1,000                 | 95,806               | 6,583                    | 34           | 87.3        | Y                      |
| <i>G. piovii</i>      | GH007   | 2                       | 447,961,852                   | 1,000                 | 109,288              | 4,104                    | 293          | 84.5        | Y                      |
|                       | GH020   | 2                       | 347,965,445                   | 1,000                 | 75,228               | 4,785                    | 227          | 85.6        | Y                      |
|                       | VN002   | 1                       | 391,732,907                   | 1,000                 | 69,940               | 3,041                    | 254          | 84.2        | Y                      |
| <i>G. swidsinskii</i> | NR016   | 1                       | 933,619,903                   | 1,000                 | 78,019               | 3,327                    | 569          | 84.5        | Y                      |
|                       | NR020   | 1                       | 542,292,693                   | 1,000                 | 96,569               | 6,804                    | 339          | 84.2        | Y                      |
|                       | NR021   | 1                       | 704,597,152                   | 1,000                 | 58,607               | 3,313                    | 458          | 79.8        | Y                      |
| <i>G. vaginalis</i>   | NR001   | 1                       | 419,092,692                   | 1,000                 | 75,848               | 7,069                    | 259          | 79.5        | Y                      |
|                       | NR038   | 1                       | 241,732,137                   | 1,000                 | 77,337               | 7,243                    | 145          | 85.6        | Y                      |
|                       | NR039   | 1                       | 356,241,041                   | 1,000                 | 89,707               | 7,181                    | 216          | 85.6        | Y                      |
| Genome sp. 3          | N170    | 1                       | 404,975,009                   | 1,000                 | 106,723              | 8,592                    | 265          | 84.9        | Y                      |
|                       | NR026   | 1                       | 260,150,009                   | 1,001                 | 67,489               | 8,126                    | 164          | 85.2        | Y                      |
|                       | NR047   | 2                       | 408,699,904                   | 1,000                 | 68,142               | 6,475                    | 269          | 85.6        | Y                      |

(\* Y: Yes, N: No)

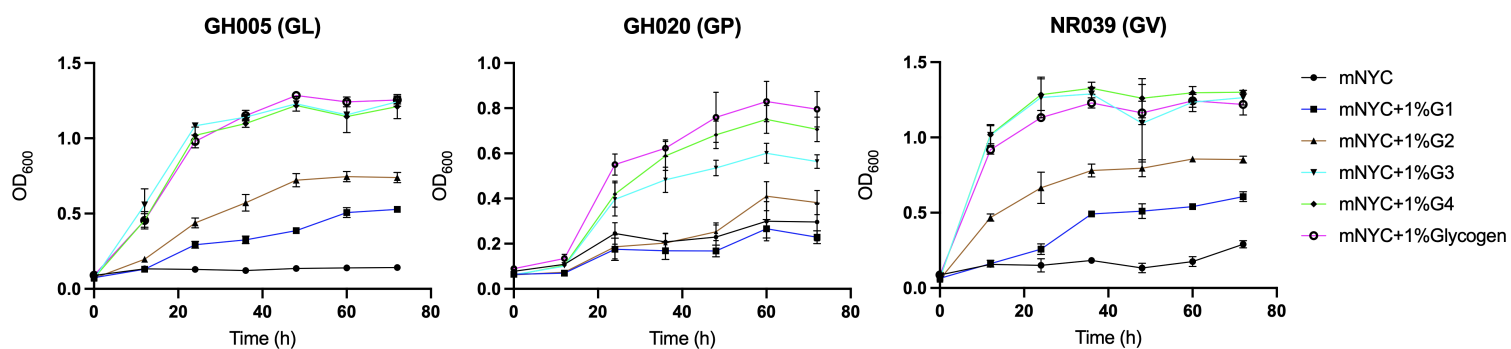

**Supplemental Figure 1:** Growth curves of 3 representative *Gardnerella* isolates (GL: *G. leopoldii*, GP: *G. piovii* and GV: *G. vaginalis*) in mNYC media, mNYC supplemented with 1% glucose, 1% maltose, 1% maltotriose, 1% maltotetraose or 1% glycogen. All data are an average of two biological replicates each with three technical replicates. Error bars represent standard deviation above and below the mean.

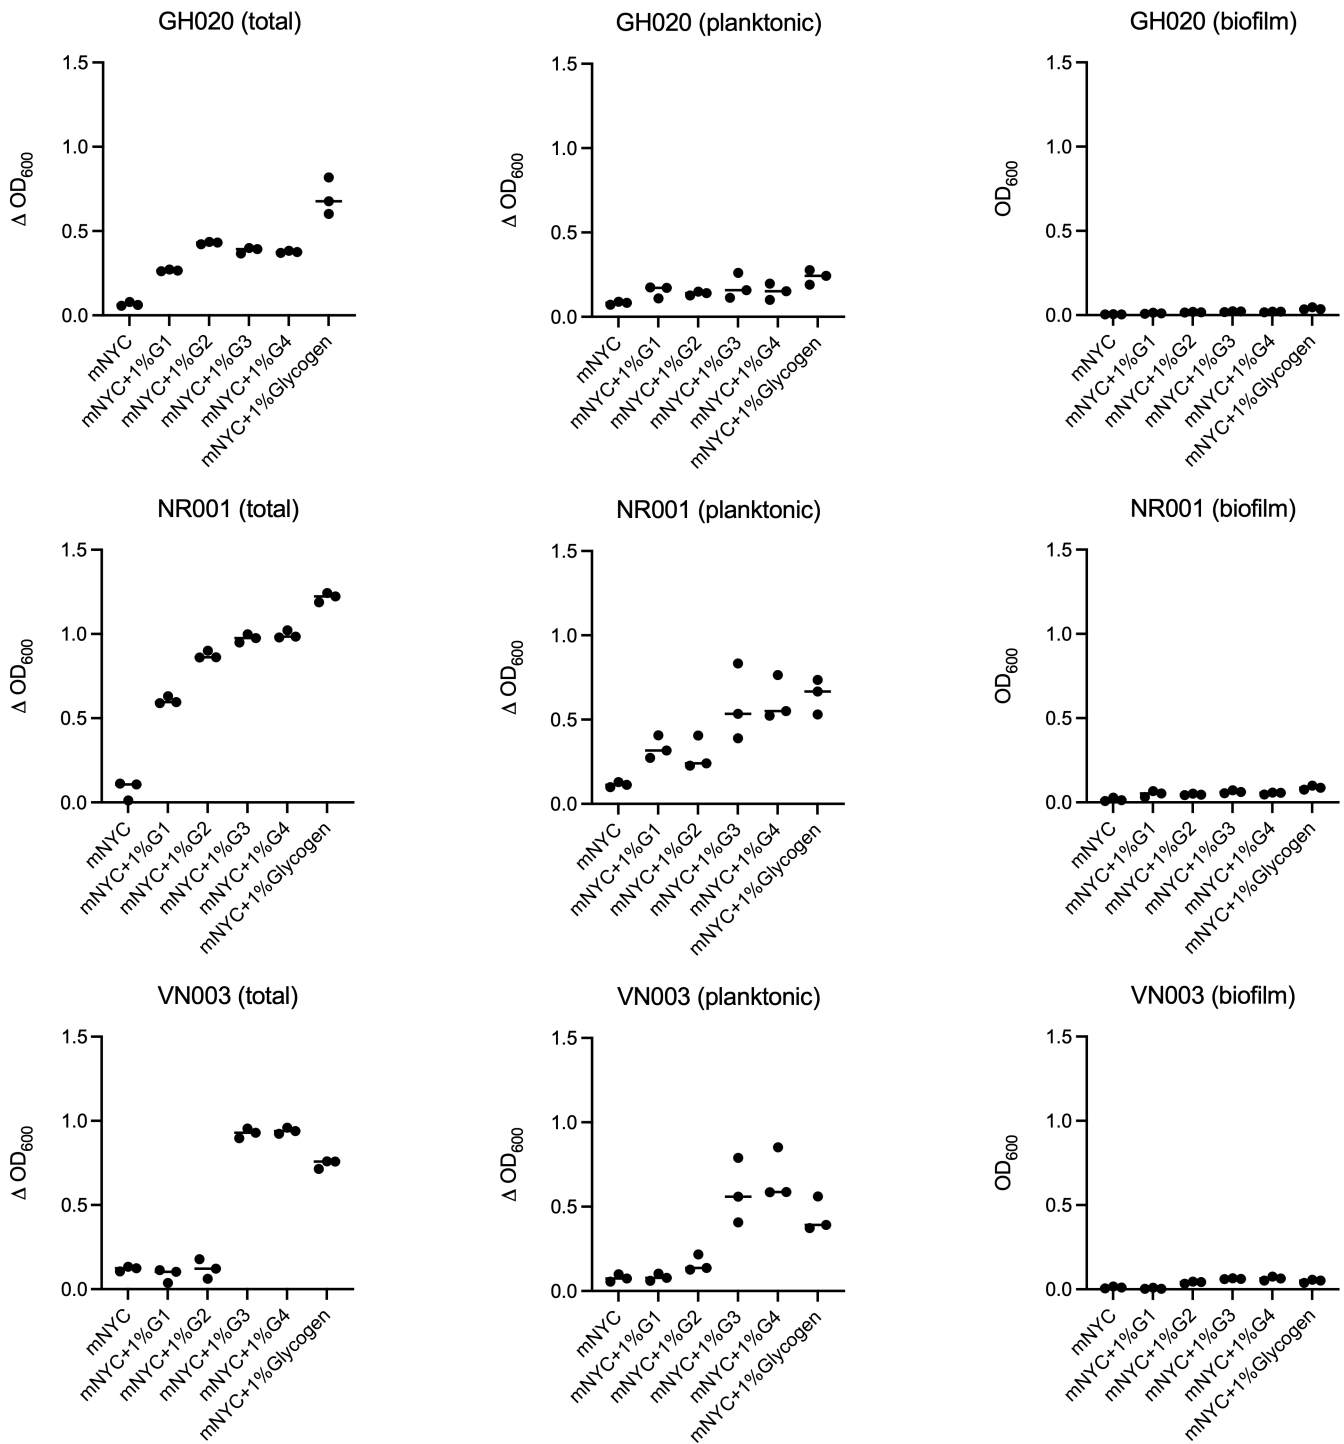

**Supplemental Figure 2:** Measurement of total (left), planktonic (middle) and biofilm (right) growth for selected isolates of *G. piotii* (GH020), *G. vaginalis* (NR001) and *G. leopoldii* (VN003). Data from three technical replicates are shown; horizontal line indicates the median. Total and planktonic growth are shown as the increase in  $OD_{600}$  from 0-48h. Biofilm growth was measured using a crystal violet stain as described in the text.
